CORRECTION

# Correction: Genetic Analyses of the Internal Transcribed Spacer Sequences Suggest Introgression and Duplication in the Medicinal Mushroom *Agaricus subrufescens*

Jie Chen, Magalie Moinard, Jianping Xu, Shouxian Wang, Marie Foulongne-Oriol, Ruilin Zhao, Kevin D. Hyde, Philippe Callac

[Table 2](#) appears incorrectly in the published article. Please see the correct [Table 2](#) and its caption here.

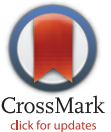

## OPEN ACCESS

**Citation:** Chen J, Moinard M, Xu J, Wang S, Foulongne-Oriol M, Zhao R, et al. (2016) Correction: Genetic Analyses of the Internal Transcribed Spacer Sequences Suggest Introgression and Duplication in the Medicinal Mushroom *Agaricus subrufescens*. PLoS ONE 11(7): e0157927. doi:10.1371/journal.pone.0157927

**Published:** July 8, 2016

**Copyright:** © 2016 Chen et al. This is an open access article distributed under the terms of the [Creative Commons Attribution License](#), which permits unrestricted use, distribution, and reproduction in any medium, provided the original author and source are credited.

**Table 2. ITS phenotypes of 94 single spore isolates of strain CA487 and their genotypic interpretation under the hypothesis of two loci *ITSI* and *ITSII*.**

| Types Of ITS | Phenotypic classes                                       |                    |                | Genotypic classes among     |                       |                |                               |                          |                |
|--------------|----------------------------------------------------------|--------------------|----------------|-----------------------------|-----------------------|----------------|-------------------------------|--------------------------|----------------|
|              | Lengths of DNA fragments <sup>a</sup> after digestion by |                    | N <sup>b</sup> | 69 homokaryons <sup>c</sup> |                       |                | 25 heterokaryons <sup>c</sup> |                          |                |
|              | enzyme <i>MbolI</i>                                      | enzyme <i>FokI</i> |                | <i>ITSI</i>                 | <i>ITSII</i>          | N <sup>b</sup> | <i>ITSI</i>                   | <i>ITSII</i>             | N <sup>b</sup> |
| [A]          | 396 (+377)                                               | 773                | 21             | <i>a</i>                    | <i>n</i> <sup>d</sup> | 19             | <i>a/a</i>                    | <i>n/n</i>               | 2              |
| [B]          | 772                                                      | 563 (+209)         | 23             | <i>b</i>                    | <i>n</i>              | 20             | <i>b/b</i>                    | <i>n/n</i>               | 3              |
| [C]          | 395+264 (+112)                                           | 562 (+209)         | 0              |                             |                       | 0              |                               |                          | 0              |
| [A+C]        | 396+264 (+395+377+112)                                   | 773+562 (+209)     | 21             | <i>a</i>                    | <i>c</i>              | 19             | <i>a/a</i>                    | <i>c/n</i> or <i>c/c</i> | 2              |
| [A+B]        | 772+396 (+377)                                           | 773+563 (+209)     | 1              |                             |                       | 0              | <i>a/b</i>                    | <i>n/n</i>               | 1              |
| [B+C]        | 772+395+264 (+112)                                       | 563 (562+209)      | 17             | <i>b</i>                    | <i>c</i>              | 11             | <i>b/b</i>                    | <i>c/n</i> or <i>c/c</i> | 6              |
| [A+B+C]      | 772+396+264 (+395+377+112)                               | 773+563 (562+209)  | 11             |                             |                       | 0              | <i>a/b</i>                    | <i>c/n</i> or <i>c/c</i> | 11             |

<sup>a</sup> Smallest or redundant uninformative bands in electrophoretic patterns are in parentheses

<sup>b</sup> N is the number of single spore isolates among each considered offspring

<sup>c</sup> Rates of homokaryotic and heterokaryotic offspring have been determined independently by using other markers

<sup>d</sup> Null allele

doi:10.1371/journal.pone.0157927.t001

## Reference

1. Chen J, Moinard M, Xu J, Wang S, Foulongne-Oriol M, Zhao R, et al. (2016) Genetic Analyses of the Internal Transcribed Spacer Sequences Suggest Introgression and Duplication in the Medicinal Mushroom *Agaricus subrufescens*. PLoS ONE 11(5): e0156250. doi: [10.1371/journal.pone.0156250](https://doi.org/10.1371/journal.pone.0156250) PMID: [27228131](https://pubmed.ncbi.nlm.nih.gov/27228131/)
